# Supplementary material for: One-pot/self-template synthesis of mesostructured vanadium oxide embedded carbon nanofiber as a visible-light photocatalyst
Source: Royal Society of Chemistry journal article supplement (doi:10.1039/c3ra42695e), 2013-12-10
Supplement: c3ra42695e.pdf [file c3ra42695e.pdf]

Electronic Supplementary Information:

**One-pot/self-template synthesis of mesostructured vanadium oxide embedded carbon nanofiber as a visible-light photocatalyst**

*Ahmed Aboueloyoun Taha, Amir A. Hriez, Hongtao Wang, Yi-nan Wu, Fengting Li \**

College of Environmental Science and Engineering, UNEP TONGJI Institute of Environment for Sustainable Development, State Key Laboratory of Pollution Control and Resource Reuse Study, Tongji University, Siping Rd 1239, Shanghai, 200092, China, E-mail address: fengting@mail.tongji.edu.cn

## **1. Experimental**

### **1.1 Chemicals**

Poly(acrylonitrile) (PAN, Mw = 150 000), poly(vinylpyrrolidone) (PVP, Mw = 1 300 000) and Ammonium metavanadate ( $\text{NH}_4\text{VO}_3$ ) were purchased from Aldrich Chemical Co., ). N,N-Dimethylformamide (DMF), Degussa-P25 and Methylene blue (MB) were provided by Sinopharm Chemical Reagent Company. All the above materials were used without further purification.

### **1.2 Synthesis of mesostructured $\text{VO}_x$ -CNFs (V-MCNF)**

In a typical one-boat synthesis,  $\text{NH}_4\text{VO}_3$  solution was prepared by dissolving 0.1 g  $\text{NH}_4\text{VO}_3$  in 9.0 g DMF at 80 °C for 3 h with vigorous stirring to form purple solution, then 1.0 g PAN was added with continued stirring at the same temperature for 2 h to form yellowish homogenous solution. Afterward, the solution was cooled down to room temperature. PVP solution was prepared by dissolving 1.0 g of PVP in 9.0 g of DMF at the room temperature with vigorous

stirring for 30 min. The two solutions were mixed and stirring at room temperature for 2 h. The above viscous yellowish solution was drawn into a hypodermic syringe for electrospinning. The positive voltage applied to the tip was 15 kV and the distance between the needle tip and the collector was 20 cm. A dense web of membrane fibers was collected on the aluminium foil. To be carbonized, the substrates were first placed in a tube furnace and stabilized in air for 4 h at 250 °C. Then subjected to nitrogen gas at 800 °C at a ramp rate 5 °C /min, and finally cooled to room temperature. The obtained carbon nanofiber denoted as V-MCNF. Meanwhile, using the same method without adding  $\text{NH}_4\text{VO}_3$ , pure carbon nanofiber was prepared and denoted as CNF.

### **1.3 Characterization of V-MCNF membrane**

The scanning electron microscopy (SEM XL30, Philips, Netherlands) and transmission electron microscopy (TEM; high resolution TEM [HRTEM], JEM 2011, JEOL, Japan) were used to characterize the morphology of the products. X-ray diffraction (XRD) measurement was carried out using an X-ray diffractometer (D/MAX-rB, Rigaku, Japan). Ultraviolet-visible spectroscopy (UV-Vis) (UV-2450, Shimadzu, Japan). X-ray photoelectron spectroscopy (XPS) was performed on a RBD upgraded PHI-5000C ESCA system (Perkin Elmer) with Mg Ka radiation ( $h\nu=1253.6$  eV). The concentrations of metal ions were measured by an Inductively Coupled Plasma Optical Emission Spectrometer (ICP-OES), (Optima 2100 DV, Perkin Elmer, USA). The nitrogen adsorption and desorption isotherms were measured at 77 K using an ASAP 2020 analyzer (ASAP 2020, Micromeritics Co., Ltd, USA). Surface areas were calculated by the Brunauer-Emmett-Teller (BET) method, and pore size distributions were calculated using the Barret–Joyner–Halenda (BJH) model. The concentrations of metal ions were measured by an Inductively Coupled Plasma Optical Emission Spectrometer (ICP-OES), (Optima 2100 DV, Perkin Elmer, USA).

#### 1.4 Photocatalytic degradation tests.

Photocatalytic decomposition of the MB was carried out in a beaker containing a suspension of 10 mg of the photocatalyst sample in 30 ml MB solution ( $20 \text{ mg} \cdot \text{l}^{-1}$ ) under visible-light irradiation. The visible light was obtained from 300W tungsten halogen lamp; the beaker was surrounded by the ice and water to avoid the heating effect. The solution was stirred in the dark for 30 min to obtain a good dispersion and reach adsorption–desorption equilibrium between the organic molecules and the catalyst surface. At a given interval of illumination, the samples of the reaction solution were taken out and analyzed by a Shimadzu UV/VIS (1700) spectrophotometer.

#### Result and discussion

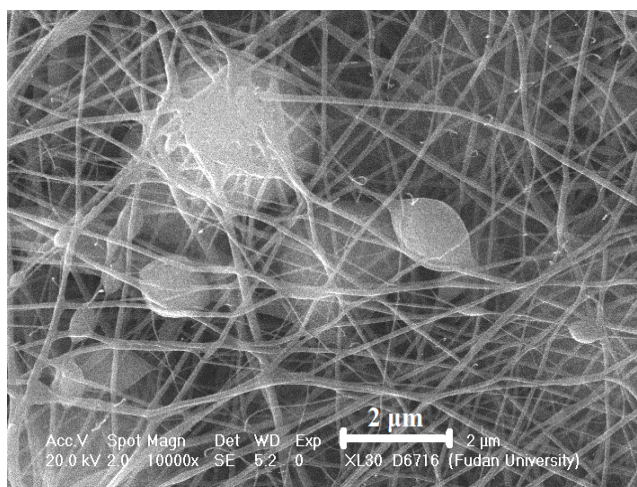

Fig. S1. SEM image of CNF with higher concentration of  $\text{NH}_4\text{VO}_3$  (0.2 g), the vanadium oxide was not successfully embedded in CNF matrix, and resulted in aggregation on the carbon nanofiber.

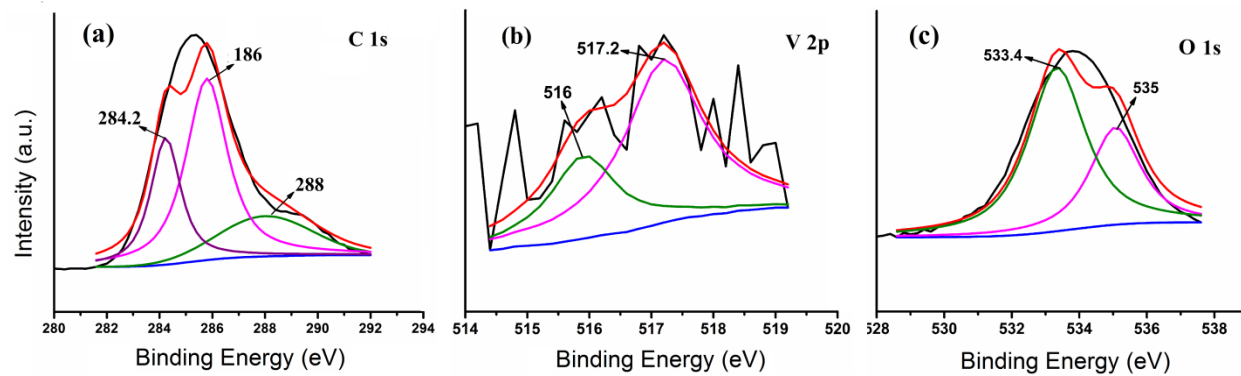

Fig. S2. (a) XPS spectra of C1s for the V-MCNF, (b) XPS spectra of V 2p for the V-MCNF and (c) XPS spectra of O1s for the V-MCNF.
